# Supplementary figures and images for: Treated Mental Illness and the Risk of Child Abuse Perpetration
Source: Atypon-hosted journal article supplement (doi:10.1176/appi.ps.201700120), 2017-11-01

### Participants and Comparison Group

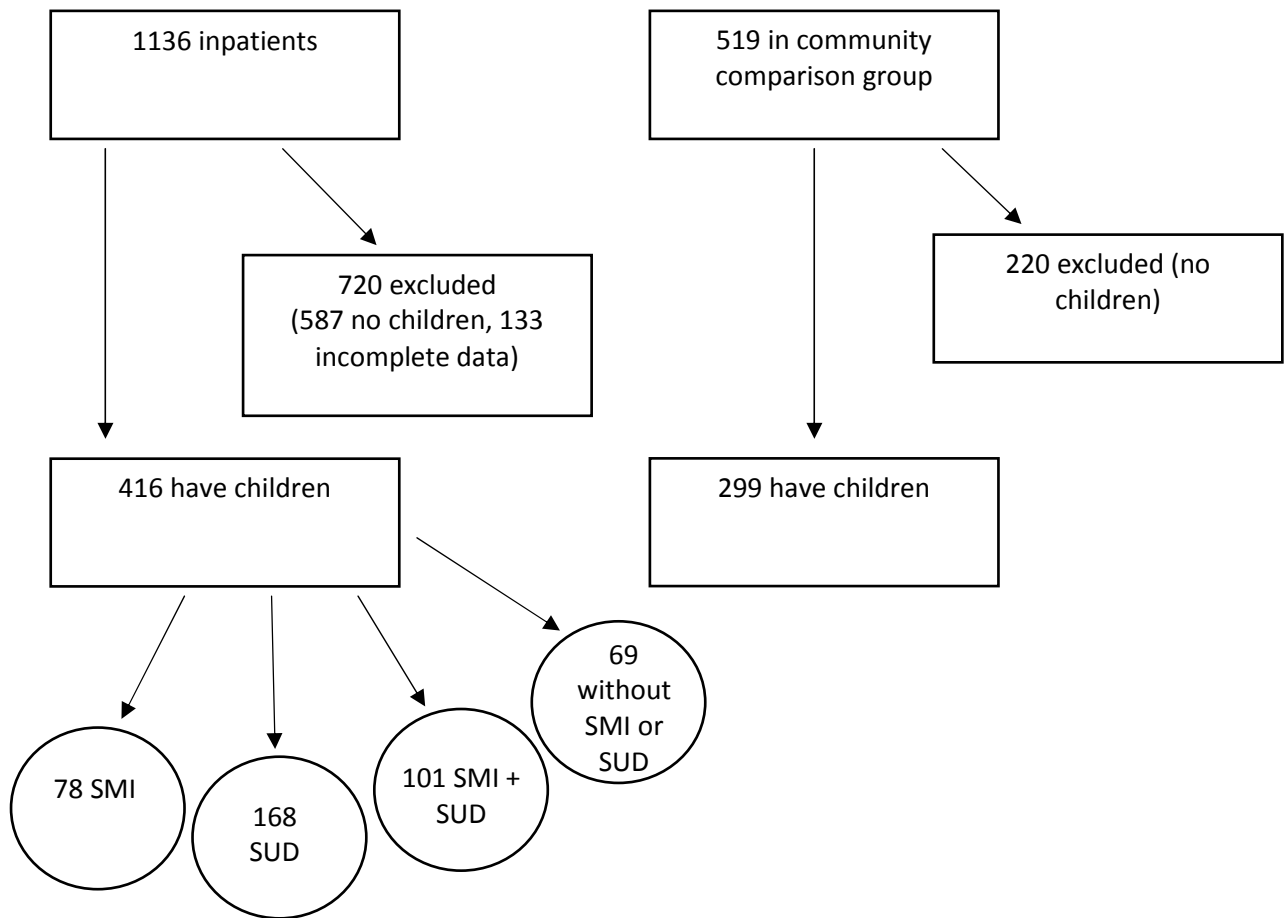

SMI= Serious Mental Illness

SUD= Substance Use Disorder

Supplement: appi.ps.201700120.ds001.pdf [file appi.ps.201700120.ds001.pdf]
